# Supplementary material for: Waiting To Give: Stated and Revealed Preferences
Source: Atypon-hosted journal article supplement (doi:10.1287/mnsc.2016.2504), 2016-09-02
Supplement: mnsc.2016.2504-sm.pdf [file mnsc.2016.2504-sm.pdf]

Supplementary Material for:  
**WAITING TO GIVE:**  
**STATED AND REVEALED PREFERENCES**

Ashley C. Craig, Harvard University  
 Ellen Garbarino, University of Sydney  
 Stephanie A. Heger, University of Sydney  
 Robert Slonim, University of Sydney

**Contents**

|                                         |           |
|-----------------------------------------|-----------|
| <b>List of Tables</b>                   | <b>0</b>  |
| <b>List of Figures</b>                  | <b>1</b>  |
| <b>Supplementary Material A</b>         | <b>2</b>  |
| Additional Tables and Figures . . . . . | 2         |
| <b>Supplementary Material B</b>         | <b>23</b> |
| Conceptual Model . . . . .              | 23        |
| Comparative Statics . . . . .           | 23        |
| <b>Supplementary Material C</b>         | <b>26</b> |
| Survey . . . . .                        | 26        |

**List of Tables**

|    |                                                                                               |   |
|----|-----------------------------------------------------------------------------------------------|---|
| S1 | ADDITIONAL OUTCOME VARIABLES: SATISFACTION WITH LENGTH OF TIME AND MADE APPOINTMENT . . . . . | 2 |
| S2 | EFFECT OF WAIT TIMES, ROBUST TO APPOINTMENTS AND PROXIMITY TO CENTER                          | 3 |
| S3 | CORRELATION IN WAIT TIMES, BY CENTER . . . . .                                                | 4 |
| S4 | PLACEBO TEST OF WAIT TIME AND DURATION . . . . .                                              | 5 |
| S5 | EFFECT OF WAIT TIMES WITH UNOBSERVED HETEROGENEITY . . . . .                                  | 6 |

|     |                                                                                         |    |
|-----|-----------------------------------------------------------------------------------------|----|
| S6  | AVERAGE EFFECT OF WAIT TIMES, OLS REGRESSION . . . . .                                  | 7  |
| S7  | AVERAGE EFFECT OF WAIT TIMES, TOBIT REGRESSION . . . . .                                | 8  |
| S8  | AVERAGE EFFECT OF WAIT TIMES, PROBIT REGRESSION . . . . .                               | 9  |
| S9  | EFFECT OF WAIT TIMES, ROBUSTNESS TO SPECIFICATION . . . . .                             | 10 |
| S10 | DISCRETE TIME HAZARD AND IV ESTIMATORS: LIKELIHOOD TO RETURN, ALL<br>DONORS . . . . .   | 11 |
| S11 | FACTOR LOADINGS, EMOTIONS AND ATTITUDES . . . . .                                       | 12 |
| S12 | EFFECT OF WAIT TIMES, ROBUSTNESS TO SPECIFICATION, WHOLE BLOOD DONORS<br>ONLY . . . . . | 13 |
| S13 | EFFECT OF WAIT ON TOTAL DONATIONS . . . . .                                             | 14 |
| S14 | PROPORTIONAL HAZARDS WITH COMPETING RISKS . . . . .                                     | 15 |
| S15 | PROPORTIONAL HAZARDS COEFFICIENT, GENDER EFFECTS . . . . .                              | 16 |
| S16 | EFFECT OF WAIT TIMES ON PLASMA CONVERSION BY GENDER . . . . .                           | 17 |
| S17 | DONATION FREQUENCY AND WAIT TIME EFFECTS . . . . .                                      | 18 |

## List of Figures

|    |                                                           |    |
|----|-----------------------------------------------------------|----|
| S1 | DURATION BY WAIT TIME, WHOLE BLOOD ONLY . . . . .         | 19 |
| S2 | DISTRIBUTION OF WAIT TIME BY APPOINTMENT STATUS . . . . . | 19 |
| S3 | ARRIVALS, POOLED ACROSS CENTERS . . . . .                 | 20 |
| S4 | ARRIVALS BY GENDER . . . . .                              | 20 |
| S5 | ARRIVALS BY AGE . . . . .                                 | 21 |
| S6 | ARRIVALS BY APPOINTMENTS . . . . .                        | 21 |
| S7 | DONATION FREQUENCY AND STRATEGIC ARRIVALS . . . . .       | 22 |

# Supplementary Material A

## Additional Tables and Figures

SUPPLEMENTAL TABLE S1: ADDITIONAL OUTCOME VARIABLES: SATISFACTION WITH LENGTH OF TIME AND MADE APPOINTMENT

|                           | Intention<br>to Return | Satisfaction<br>with Wait | Made<br>Appointment | Intention<br>to Return | Satisfaction<br>with Wait | Made<br>Appointment |
|---------------------------|------------------------|---------------------------|---------------------|------------------------|---------------------------|---------------------|
| Wait                      | -0.003***<br>(0.001)   | -0.01***<br>(0.001)       | -0.003**<br>(0.001) | -0.002*<br>(0.001)     | -0.006***<br>(0.001)      | -0.003**<br>(0.001) |
| Yearly Donation Rate      | 0.14***<br>(0.02)      | -0.02<br>(0.02)           | 0.01<br>(0.02)      | 0.13***<br>(0.02)      | -0.01<br>(0.02)           | 0.008<br>(0.02)     |
| Female                    | 0.08**<br>(0.04)       | 0.08**<br>(0.03)          | 0.09**<br>(0.05)    | 0.08**<br>(0.03)       | 0.06*<br>(0.04)           | 0.08*<br>(0.05)     |
| Older than 65 years       | 0.13<br>(0.09)         | 0.16**<br>(0.06)          | 0.03<br>(0.07)      | 0.08<br>(0.09)         | 0.08<br>(0.06)            | 0.03<br>(0.07)      |
| Observations              | 565                    | 842                       | 439                 | 565                    | 842                       | 439                 |
| Emotions                  | N                      | N                         | N                   | p-value<.01            | p-value<.0001             | p-value=.25         |
| Attitudes                 | N                      | N                         | N                   | p-value<.01            | p-value=.21               | p-value<.01         |
| Center Fixed Effects      | Y                      | Y                         | Y                   | Y                      | Y                         | Y                   |
| Day of Week Fixed Effects | Y                      | Y                         | Y                   | Y                      | Y                         | Y                   |
| Time of Day Fixed Effects | Y                      | Y                         | Y                   | Y                      | Y                         | Y                   |
| AB Pos & O Neg            | Y                      | Y                         | Y                   | Y                      | Y                         | Y                   |

Marginal Coefficients from Ordered Probit (col (1), (2), (4), (5)) and Probit (col (3) and (6)) Regressions. Col (1) and (3) restrict the sample to those survey respondents that do not make a follow-up appointment at the time of the survey (or who were not asked to make a follow-up appointment). In col (1) - (3) we include the main set of variables and in col (4) - (6) we include the emotions and attitude variables. Robust Standard Errors in parentheses and \*, \*\* and \*\*\* indicate statistical significance at the 10%, 5% and 1% levels, respectively.

SUPPLEMENTAL TABLE S2: EFFECT OF WAIT TIMES, ROBUST TO APPOINTMENTS AND PROXIMITY TO CENTER

|                                   | Likelihood to Return |                      |                     |                      |
|-----------------------------------|----------------------|----------------------|---------------------|----------------------|
|                                   | Whole blood & Plasma | Whole blood & Plasma | Whole blood only    | Whole blood only     |
| <i>Wait</i>                       | -0.004**<br>(0.002)  | -0.005**<br>(0.002)  | -0.005**<br>(0.003) | -0.006**<br>(0.003)  |
| Appointment                       | 0.23**<br>(0.1)      | .                    | 0.35***<br>(0.13)   | .                    |
| distance                          | .                    | 0.0006**<br>(0.0003) | .                   | 0.0006**<br>(0.0003) |
| Yearly Donation Rate              | 0.24***<br>(0.04)    | 0.24***<br>(0.05)    | 0.35***<br>(0.07)   | 0.34***<br>(0.08)    |
| Female                            | -0.13*<br>(0.07)     | -0.09<br>(0.07)      | -0.18*<br>(0.1)     | -0.12<br>(0.09)      |
| Older than 65 years               | 0.26***<br>(0.1)     | 0.26***<br>(0.1)     | 0.53***<br>(0.19)   | 0.55***<br>(0.19)    |
| ABPOS                             | 0.13<br>(0.19)       | 0.1<br>(0.19)        | 0.07<br>(0.27)      | -0.003<br>(0.27)     |
| ONEG                              | 0.06<br>(0.11)       | 0.08<br>(0.1)        | 0.18<br>(0.16)      | 0.19<br>(0.15)       |
| Observations                      | 839                  | 836                  | 767                 | 766                  |
| Log Likelihood                    | -1279.76             | -1277.17             | -1619.98            | -1629.45             |
| Ancillary Parameter ( $\hat{p}$ ) | -0.004               | -0.004               | -0.007              | -0.007               |
| Center Fixed Effects              | Y                    | Y                    | Y                   | Y                    |
| Day of Week Fixed Effects         | Y                    | Y                    | Y                   | Y                    |
| Time of Day Fixed Effects         | Y                    | Y                    | Y                   | Y                    |
| AB Pos & O Neg                    | Y                    | Y                    | Y                   | Y                    |

Coefficients from Gompertz hazard model. Robust Standard Errors in parentheses and \*, \*\* and \*\*\* indicate statistical significance at the 10%, 5% and 1% levels, respectively.

SUPPLEMENTAL TABLE S3: CORRELATION IN WAIT TIMES, BY CENTER

|                           | Current Wait       |                    |                    |                  | Next Wait          |                    |                    |                    |
|---------------------------|--------------------|--------------------|--------------------|------------------|--------------------|--------------------|--------------------|--------------------|
|                           | A                  | B                  | C                  | By Center<br>D   | A                  | B                  | C                  | D                  |
| Previous Wait             | 0.05<br>(0.05)     | 0.2***<br>(0.05)   | 0.002<br>(0.05)    | 0.2<br>(0.32)    | .                  | .                  | .                  | .                  |
| Current Wait              | .                  | .                  | .                  | .                | 0.09<br>(0.06)     | 0.07<br>(0.05)     | 0.25<br>(0.43)     | -0.1<br>(0.2)      |
| Constant                  | 37.10***<br>(3.31) | 43.22***<br>(4.05) | 46.60***<br>(7.06) | 19.82<br>(14.80) | 35.46***<br>(4.68) | 32.76***<br>(3.29) | 35.69**<br>(14.13) | 37.83***<br>(7.96) |
| Observations              | 386                | 229                | 19                 | 16               | 410                | 234                | 20                 | 19                 |
| $R^2$                     | 0.11               | 0.09               | 0.52               | 0.2              | 0.02               | 0.02               | 0.33               | 0.07               |
| Day of Week Fixed Effects | Y                  | Y                  | Y                  | Y                | Y                  | Y                  | Y                  | Y                  |
| Time of Day Fixed Effects | Y                  | Y                  | Y                  | Y                | Y                  | Y                  | Y                  | Y                  |

OLS regressions. Outcome variable: column (1)-(4) current wait time; column (5)-(8) subsequent wait time. Robust Standard Errors in parentheses and \*, \*\* and \*\*\* indicate statistical significance at the 10%, 5% and 1% levels, respectively.

SUPPLEMENTAL TABLE S4: PLACEBO TEST OF WAIT TIME AND DURATION

|                           | Current<br>Duration   | Previous<br>Duration | Current<br>Duration  |
|---------------------------|-----------------------|----------------------|----------------------|
| $\widetilde{Wait}$        | 1.97**<br>(1.01)      | 0.38<br>(0.44)       | .                    |
| Next Wait                 | .                     | .                    | 0.11<br>(0.29)       |
| Yearly Donation Rate      | -98.39***<br>(17.79)  | -70.19***<br>(8.52)  | -27.34***<br>(4.61)  |
| Female                    | 33.31<br>(32.21)      | -1.88<br>(13.40)     | 0.07<br>(9.98)       |
| Older than 65 years       | -105.98***<br>(36.34) | -27.36**<br>(12.14)  | -13.23<br>(9.27)     |
| Constant                  | 519.65***<br>(99.37)  | 282.93***<br>(33.65) | 159.85***<br>(24.54) |
| Observations              | 848                   | 750                  | 677                  |
| $R^2$                     | 0.09                  | 0.16                 | 0.07                 |
| Center Fixed Effects      | Y                     | Y                    | Y                    |
| Day of Week Fixed Effects | Y                     | Y                    | Y                    |
| Time of Day Fixed Effects | Y                     | Y                    | Y                    |
| AB Pos & O Neg            | Y                     | Y                    | Y                    |

Linear regression coefficients. Col (1) repeats the analysis from Table S6 for comparison and accounts for the right-censoring in the data. The sample in Col (2) are those donors who donated during the survey period and donated once before and returned. The sample in Col (3) are those donors who donated during the survey time and returned to donate at some subsequent time. Col (2) and (3) do not have censored observations and are therefore estimated via OLS. Outcome variable is the duration (number of days) beyond eligibility until the donor returns for the current donation, the previous donation and the subsequent donation, respectively. Col (2) shows that the current wait does not predict the previous duration, while col (3) shows that the wait time the donor experiences on his subsequent donation does not affect his current duration. Robust Standard Errors in parentheses and \*, \*\* and \*\*\* indicate statistical significance at the 10%, 5% and 1% levels, respectively.

SUPPLEMENTAL TABLE S5: EFFECT OF WAIT TIMES WITH UNOBSERVED HETEROGENEITY

|                                   | Survey donors        |                      | All donors           |                      |
|-----------------------------------|----------------------|----------------------|----------------------|----------------------|
|                                   | Likelihood to Return | Likelihood to Return | Likelihood to Return | Likelihood to Return |
| $\widetilde{Wait}$                | -0.005**<br>(0.002)  | -0.005**<br>(0.002)  | -0.003***<br>(0.001) | -0.003**<br>(0.001)  |
| Yearly Donation Rate              | 0.24***<br>(0.05)    | 0.24***<br>(0.04)    | 0.28***<br>(0.03)    | 0.26***<br>(0.02)    |
| Female                            | -0.09<br>(0.07)      | -0.09<br>(0.08)      | -0.17***<br>(0.04)   | -0.18***<br>(0.05)   |
| Older than 65 years               | 0.26***<br>(0.1)     | 0.26**<br>(0.12)     | 0.15**<br>(0.07)     | 0.13<br>(0.08)       |
| Observations                      | 848                  | 848                  | 2390                 | 2390                 |
| Log Likelihood                    | -1295.83             | -1295.83             | -3669.25             | -3668.08             |
| Ancillary Parameter ( $\hat{p}$ ) | -0.004               | -0.004               | -0.003               | -0.003               |
| Center Fixed Effects              | Y                    | Y                    | Y                    | Y                    |
| Day of Week Fixed Effects         | Y                    | Y                    | Y                    | Y                    |
| Time of Day Fixed Effects         | Y                    | Y                    | Y                    | Y                    |
| AB Pos & O Neg                    | Y                    | Y                    | Y                    | Y                    |

Coefficients from a proportional hazard model with unobserved heterogeneity. Robust Standard Errors in parentheses and \*, \*\* and \*\*\* indicate statistical significance at the 10%, 5% and 1% levels, respectively.

SUPPLEMENTAL TABLE S6: AVERAGE EFFECT OF WAIT TIMES, OLS REGRESSION

|                            | Survey donors                       |                       |                       | All donors           |                       |
|----------------------------|-------------------------------------|-----------------------|-----------------------|----------------------|-----------------------|
|                            | Duration, days delayed until return |                       |                       |                      |                       |
| $\widetilde{Wait}$         | 2.54***<br>(0.95)                   | 1.97**<br>(1.01)      | 2.02**<br>(1.01)      | 2.13***<br>(0.57)    | 1.35**<br>(0.62)      |
| Yearly Donation Rate       | .                                   | -98.39***<br>(17.79)  | -90.34***<br>(17.77)  | .                    | -112.63***<br>(13.44) |
| Female                     | .                                   | 33.31<br>(32.21)      | 39.69<br>(32.46)      | .                    | 73.55***<br>(19.70)   |
| Older than 65 years        | .                                   | -105.98***<br>(36.34) | -86.81**<br>(34.68)   | .                    | -61.06**<br>(27.86)   |
| Pos. about Wait            | .                                   | .                     | 14.66<br>(22.66)      | .                    | .                     |
| Neg. while Waiting         | .                                   | .                     | 41.07<br>(27.15)      | .                    | .                     |
| Pos. while Waiting         | .                                   | .                     | -13.74<br>(23.56)     | .                    | .                     |
| Pos. Donation Attitude     | .                                   | .                     | -44.05**<br>(19.77)   | .                    | .                     |
| Pos. View of Blood Service | .                                   | .                     | -41.21*<br>(22.25)    | .                    | .                     |
| Acceptable Wait Time       | .                                   | .                     | 21.66<br>(13.30)      | .                    | .                     |
| Constant                   | 333.20***<br>(16.52)                | 519.65***<br>(99.37)  | 385.31***<br>(127.35) | 354.54***<br>(10.08) | 467.93***<br>(53.14)  |
| Observations               | 848                                 | 848                   | 848                   | 2388                 | 2388                  |
| $R^2$                      | 0.01                                | 0.09                  | 0.11                  | 0.006                | 0.11                  |
| Center Fixed Effects       | N                                   | Y                     | Y                     | N                    | Y                     |
| Day of Week Fixed Effects  | N                                   | Y                     | Y                     | N                    | Y                     |
| Time of Day Fixed Effects  | N                                   | Y                     | Y                     | N                    | Y                     |
| AB Pos & O Neg             | N                                   | Y                     | Y                     | N                    | Y                     |
| Emotions & Attitudes       | N                                   | N                     | Y                     | N                    | N                     |

OLS coefficients. Outcome variable is the duration (number of days) beyond eligibility until the donor returns. Donors who are right-censored are coded as returning the day after we stopped observing donors' behavior (day 1,461). Col (1) can be interpreted as a 20 minute increase in average wait time results in a nearly 50 day delay. The estimated effect of wait time increases if we increase the duration of the non-return donors. Robust Standard Errors in parentheses and \*, \*\* and \*\*\* indicate statistical significance at the 10%, 5% and 1% levels, respectively.

SUPPLEMENTAL TABLE S7: AVERAGE EFFECT OF WAIT TIMES, TOBIT REGRESSION

|                            | Survey donors                       |                       |                       | All donors           |                       |
|----------------------------|-------------------------------------|-----------------------|-----------------------|----------------------|-----------------------|
|                            | Duration, days delayed until return |                       |                       |                      |                       |
| $\widetilde{Wait}$         | 2.96***<br>(1.14)                   | 2.29**<br>(1.20)      | 2.37**<br>(1.19)      | 2.51***<br>(0.69)    | 1.60**<br>(0.73)      |
| Yearly Donation Rate       | .                                   | -112.02***<br>(20.69) | -102.21***<br>(20.57) | .                    | -129.07***<br>(15.88) |
| Female                     | .                                   | 38.20<br>(37.61)      | 45.36<br>(37.80)      | .                    | 85.32***<br>(23.40)   |
| Older than 65 years        | .                                   | -119.91***<br>(41.48) | -96.23**<br>(39.39)   | .                    | -68.31**<br>(32.20)   |
| Pos. about Wait            | .                                   | .                     | 18.77<br>(26.25)      | .                    | .                     |
| Neg. while Waiting         | .                                   | .                     | 50.81<br>(33.03)      | .                    | .                     |
| Pos. while Waiting         | .                                   | .                     | -17.47<br>(27.72)     | .                    | .                     |
| Pos. Donation Attitude     | .                                   | .                     | -51.78**<br>(23.35)   | .                    | .                     |
| Pos. View of Blood Service | .                                   | .                     | -47.58*<br>(26.75)    | .                    | .                     |
| Acceptable Wait Time       | .                                   | .                     | 26.16*<br>(15.34)     | .                    | .                     |
| Constant                   | 365.47***<br>(21.66)                | 581.62***<br>(117.16) | 418.82***<br>(147.27) | 391.03***<br>(13.42) | 523.31***<br>(63.59)  |
| Observations               | 848                                 | 848                   | 848                   | 2388                 | 2388                  |
| Pseudo $R^2$               | 0.0007                              | 0.007                 | 0.008                 | 0.0005               | 0.008                 |
| Center Fixed Effects       | N                                   | Y                     | Y                     | N                    | Y                     |
| Day of Week Fixed Effects  | N                                   | Y                     | Y                     | N                    | Y                     |
| Time of Day Fixed Effects  | N                                   | Y                     | Y                     | N                    | Y                     |
| AB Pos & O Neg             | N                                   | Y                     | Y                     | N                    | Y                     |
| Emotions & Attitudes       | N                                   | N                     | Y                     | N                    | N                     |

Linear regression coefficients with right-censored observations at 1440 days. Outcome variable is the duration (number of days) beyond eligibility until the donor returns. Col (1) can be interpreted as a 20 minute increase in average wait time results in a nearly 60 day delay. The estimated effect of wait time increases if we increase the duration of the non-return donors. Robust Standard Errors in parentheses and \*, \*\* and \*\*\* indicate statistical significance at the 10%, 5% and 1% levels, respectively.

SUPPLEMENTAL TABLE S8: AVERAGE EFFECT OF WAIT TIMES, PROBIT REGRESSION

|                           | Survey donors                   |                                  | All donors                      |                                  |
|---------------------------|---------------------------------|----------------------------------|---------------------------------|----------------------------------|
|                           | Likelihood to Return in 50 days | Likelihood to Return in 100 days | Likelihood to Return in 50 days | Likelihood to Return in 100 days |
| <i>Wait</i>               | -0.0003<br>(0.0003)             | -0.0009<br>(0.001)               | -0.0003**<br>(0.0002)           | -0.001*<br>(0.0006)              |
| Yearly Donation Rate      | 0.007<br>(0.005)                | 0.13***<br>(0.02)                | 0.02***<br>(0.003)              | 0.16***<br>(0.01)                |
| Female                    | -0.01<br>(0.01)                 | -0.06<br>(0.04)                  | -0.004<br>(0.006)               | -0.07***<br>(0.02)               |
| Older than 65 years       | -0.03***<br>(0.009)             | 0.09<br>(0.06)                   | -0.03***<br>(0.004)             | 0.02<br>(0.04)                   |
| Observations              | 796                             | 848                              | 2388                            | 2388                             |
| Pseudo $R^2$              | 0.12                            | 0.09                             | 0.14                            | 0.1                              |
| Center Fixed Effects      | Y                               | Y                                | Y                               | Y                                |
| Day of Week Fixed Effects | Y                               | Y                                | Y                               | Y                                |
| Time of Day Fixed Effects | Y                               | Y                                | Y                               | Y                                |
| AB Pos & O Neg            | Y                               | Y                                | Y                               | Y                                |

Marginal effects from probit regressions. Robust Standard Errors in parentheses and \*, \*\* and \*\*\* indicate statistical significance at the 10%, 5% and 1% levels, respectively.

SUPPLEMENTAL TABLE S9: EFFECT OF WAIT TIMES, ROBUSTNESS TO SPECIFICATION

|                           | Survey donors                                              |                                                       | All donors                                                 |                                                       |
|---------------------------|------------------------------------------------------------|-------------------------------------------------------|------------------------------------------------------------|-------------------------------------------------------|
|                           | Likelihood<br>to Return<br>Cox PH Model<br>Semi-Parametric | Likelihood<br>to Return<br>Log-Logistic<br>Parametric | Likelihood<br>to Return<br>Cox PH Model<br>Semi-Parametric | Likelihood<br>to Return<br>Log-Logistic<br>Parametric |
| $\widetilde{Wait}$        | -0.005**<br>(0.002)                                        | 0.004*<br>(0.003)                                     | -0.004**<br>(0.002)                                        | 0.003**<br>(0.002)                                    |
| Yearly Donation Rate      | 0.28***<br>(0.06)                                          | -0.31***<br>(0.04)                                    | 0.34***<br>(0.03)                                          | -0.37***<br>(0.03)                                    |
| Female                    | -0.12<br>(0.07)                                            | 0.07<br>(0.08)                                        | -0.19***<br>(0.04)                                         | 0.18***<br>(0.05)                                     |
| Older than 65 years       | 0.34***<br>(0.13)                                          | -0.16**<br>(0.08)                                     | 0.19**<br>(0.09)                                           | -0.03<br>(0.06)                                       |
| AB Positive               | 0.16<br>(0.2)                                              | -0.25<br>(0.22)                                       | 0.07<br>(0.13)                                             | -0.15<br>(0.15)                                       |
| O Negative                | 0.1<br>(0.12)                                              | -0.07<br>(0.11)                                       | 0.17**<br>(0.07)                                           | -0.14**<br>(0.07)                                     |
| Constant                  | .                                                          | 5.43***<br>(0.25)                                     | .                                                          | 5.37***<br>(0.14)                                     |
| Observations              | 848                                                        | 848                                                   | 2389                                                       | 2389                                                  |
| Log Likelihood            | -4333.38                                                   | -1353.02                                              | -14141.89                                                  | -3837.17                                              |
| Center Fixed Effects      | Y                                                          | Y                                                     | Y                                                          | Y                                                     |
| Day of Week Fixed Effects | Y                                                          | Y                                                     | Y                                                          | Y                                                     |
| Time of Day Fixed Effects | Y                                                          | Y                                                     | Y                                                          | Y                                                     |
| AB Pos & O Neg            | Y                                                          | Y                                                     | Y                                                          | Y                                                     |

Col (1) & (3) replicates Table 4 of main text using a semi-parametric Cox proportional hazard model. The semi-parametric model does not parameterize the baseline hazard and thus the estimates do not suffer from potential mis-specification. Col (2) & (4) replicates Table 4 in main text with log-logistic parametrization, Time Ratios Reported. The log-logistic function permits non-monotonic hazard functions; (2) . Center, day of week, time of day fixed effects included and dummies for AB Positive and O Negative blood types. Robust Standard Errors in parentheses and \*, \*\* and \*\*\* indicate statistical significance at the 10%, 5% and 1% levels, respectively.

SUPPLEMENTAL TABLE S10: DISCRETE TIME HAZARD AND IV ESTIMATORS: LIKELIHOOD TO RETURN, ALL DONORS

|                     | Discrete Time<br>Hazard | IV Estimator<br>Control Function Estimation | IV Estimator<br>GMM Estimation |
|---------------------|-------------------------|---------------------------------------------|--------------------------------|
| $\widehat{Wait}$    | -0.003**<br>(0.002)     | -0.006***<br>(0.003)                        | -0.007**<br>(0.005)            |
| Donation History    | 0.41***<br>(0.04)       | 0.40***<br>(0.05)                           | 0.40***<br>(0.02)              |
| Female              | -0.20*<br>(0.05)        | -0.20<br>(0.05)                             | -0.21**<br>(0.05)              |
| Older than 65 years | 0.17*<br>(0.10)         | 0.18**<br>(0.09)                            | 0.18**<br>(0.09)               |
| AB Positive         | 0.10<br>(0.14)          | 0.11<br>(0.14)                              | 0.11<br>(0.14)                 |
| O Negative          | 0.18**<br>(0.08)        | 0.19**<br>(0.08)                            | 0.19**<br>(0.08)               |
| Residual            | .                       | -0.005<br>(0.003)                           | .                              |
| Constant            | -2.47***<br>(0.18)      | -2.15***<br>(0.24)                          | -2.14***<br>(0.18)             |
| Observations        | 58,087                  | 60,473                                      | 60,365                         |
| Log Likelihood      | -7405.30                | .                                           | .                              |

Col (1) Coefficients of the discrete time hazard model estimated via logistic regression. Col (2) Coefficients from second stage of the IV estimation, using the control function approach and standard errors bootstrapped with 199 replications. Col (3) Coefficients from IV estimation, using a one-step GMM estimation. Center fixed effects, time of day, and day of week. Robust Standard Errors in parentheses and \*, \*\* and \*\*\* indicate statistical significance at the 10%, 5% and 1% levels, respectively. Given that we have a directional hypothesis for the effect of wait time, the estimates on  $\widehat{Wait}$  are one-tailed; all other coefficient tests are two-tailed.

SUPPLEMENTAL TABLE S11: FACTOR LOADINGS, EMOTIONS AND ATTITUDES

|                                      | Feelings about waiting experience |          |
|--------------------------------------|-----------------------------------|----------|
|                                      | Factor 1                          |          |
| pleasant                             | 0.8857                            |          |
| enjoyable                            | 0.8529                            |          |
| fair                                 | 0.8965                            |          |
| reasonable                           | 0.8908                            |          |
|                                      | Feelings while waiting            |          |
|                                      | Factor 1                          | Factor 2 |
| relaxed                              | -0.2127                           | 0.9163   |
| calm                                 | -0.2053                           | 0.9279   |
| annoyed                              | 0.8803                            | -0.1837  |
| angry                                | 0.9272                            | -0.1373  |
| frustrated                           | 0.9126                            | -0.1937  |
| upset                                | 0.8857                            | -0.2073  |
| content                              | -0.1019                           | 0.7651   |
|                                      | Attitudes towards Blood Donation  |          |
|                                      | Factor1                           |          |
| loss if gave up                      | 0.6400                            |          |
| means more to me than just donating  | 0.7191                            |          |
| important part of me                 | 0.7999                            |          |
| moral obligation to donate           | 0.7787                            |          |
| personality responsibility to donate | 0.8265                            |          |
| social obligation to donate          | 0.6808                            |          |
|                                      | Attitudes towards Blood Service   |          |
|                                      | Factor1                           |          |
| high integrity                       | 0.8587                            |          |
| counted on to do what's right        | 0.8816                            |          |
| honest & truthful                    | 0.8558                            |          |
| fast efficient procedures            | 0.7160                            |          |
| highly competent                     | 0.8650                            |          |
| knows what they're doing             | 0.8925                            |          |

Factor loadings were estimated using principal factor analysis.

SUPPLEMENTAL TABLE S12: EFFECT OF WAIT TIMES, ROBUSTNESS TO SPECIFICATION, WHOLE BLOOD DONORS ONLY

|                           | Survey donors<br>Likelihood<br>to Return<br>Cox PH Model<br>Semi-Parametric | All donors<br>Likelihood<br>to Return<br>Cox PH Model<br>Semi-Parametric |
|---------------------------|-----------------------------------------------------------------------------|--------------------------------------------------------------------------|
| $\widetilde{Wait}$        | -0.005**<br>(0.003)                                                         | -0.003**<br>(0.002)                                                      |
| Yearly Donation Rate      | 0.29***<br>(0.06)                                                           | 0.37***<br>(0.05)                                                        |
| Female                    | -0.11<br>(0.08)                                                             | -0.18***<br>(0.05)                                                       |
| Older than 65 years       | 0.45***<br>(0.14)                                                           | 0.27***<br>(0.1)                                                         |
| AB Positive               | 0.06<br>(0.23)                                                              | -0.0002<br>(0.15)                                                        |
| O Negative                | 0.15<br>(0.12)                                                              | 0.22***<br>(0.07)                                                        |
| Observations              | 776                                                                         | 2198                                                                     |
| Log Likelihood            | -3849.75                                                                    | -12682.98                                                                |
| Center Fixed Effects      | Y                                                                           | Y                                                                        |
| Day of Week Fixed Effects | Y                                                                           | Y                                                                        |
| Time of Day Fixed Effects | Y                                                                           | Y                                                                        |
| AB Pos & O Neg            | Y                                                                           | Y                                                                        |

Coefficients from a Cox proportional hazard model, replicating Table 7. Robust Standard Errors in parentheses and \*, \*\* and \*\*\* indicate statistical significance at the 10%, 5% and 1% levels, respectively.

SUPPLEMENTAL TABLE S13: EFFECT OF WAIT ON TOTAL DONATIONS

|                           | Survey Donors, Whole Blood          | Survey Donors, All | Survey Donors, All |                    | All Donors          |                     |
|---------------------------|-------------------------------------|--------------------|--------------------|--------------------|---------------------|---------------------|
|                           | Total Donations over Next 48 months |                    |                    |                    |                     |                     |
| $\widetilde{Wait}$        | -0.01***<br>(0.006)                 | -0.01**<br>(0.006) | -0.01**<br>(0.005) | -0.01**<br>(0.006) | -0.007**<br>(0.003) | -0.01***<br>(0.003) |
| Yearly Donation Rate      | 1.21***<br>(0.14)                   | 0.96***<br>(0.11)  | 1.14***<br>(0.13)  | 0.96***<br>(0.11)  | 0.84***<br>(0.13)   | 0.49***<br>(0.11)   |
| Female                    | -0.22<br>(0.19)                     | -0.16<br>(0.18)    | -0.19<br>(0.19)    | -0.16<br>(0.18)    | -0.39***<br>(0.11)  | -0.42***<br>(0.11)  |
| Older than 65 years       | 0.75**<br>(0.36)                    | 0.72**<br>(0.28)   | 0.96***<br>(0.36)  | 0.72**<br>(0.28)   | 1.28***<br>(0.27)   | 1.22***<br>(0.24)   |
| Constant                  | 2.01***<br>(0.57)                   | .                  | 1.83***<br>(0.57)  | .                  | 2.28***<br>(0.33)   | .                   |
| Observations              | 776                                 | 848                | 848                | 848                | 2387                | 2387                |
| $R^2$                     | 0.28                                | .                  | 0.26               | .                  | 0.2                 | .                   |
| Pseudo $R^2$              | .                                   | 0.12               | .                  | 0.12               | .                   | 0.08                |
| Center Fixed Effects      | Y                                   | Y                  | Y                  | Y                  | Y                   | Y                   |
| Day of Week Fixed Effects | Y                                   | Y                  | Y                  | Y                  | Y                   | Y                   |
| Time of Day Fixed Effects | Y                                   | Y                  | Y                  | Y                  | Y                   | Y                   |
| AB Pos & O Neg            | Y                                   | Y                  | Y                  | Y                  | Y                   | Y                   |

Col (1), (3), (5) are OLS coefficients. Col (2), (4), (6) are marginal effects from Poisson regressions. Robust Standard Errors in parentheses and \*, \*\* and \*\*\* indicate statistical significance at the 10%, 5% and 1% levels, respectively. Given that we have a directional hypothesis for the effect of wait time, the estimates on  $\widetilde{Wait}$  are one-tailed; all other coefficient tests are two-tailed.

SUPPLEMENTAL TABLE S14: PROPORTIONAL HAZARDS WITH COMPETING RISKS

|                                            | Survey Donors       |                    |                     | All Donors           |                     |                     |
|--------------------------------------------|---------------------|--------------------|---------------------|----------------------|---------------------|---------------------|
| $\widetilde{Wait} \times$ Return to WB     | -0.005**<br>(0.002) | -0.005*<br>(0.003) | -0.005**<br>(0.003) | -0.005***<br>(0.001) | -0.004**<br>(0.002) | -0.004**<br>(0.002) |
| $\widetilde{Wait} \times$ Return to P      | -0.01**<br>(0.007)  | -0.01**<br>(0.007) | -0.01*<br>(0.007)   | -0.01***<br>(0.005)  | -0.01***<br>(0.005) | -0.01**<br>(0.005)  |
| Yearly Donation Rate                       | .                   | 0.34***<br>(0.07)  | .                   | .                    | 0.38***<br>(0.04)   | .                   |
| Female                                     | .                   | -0.13<br>(0.09)    | .                   | .                    | -0.22***<br>(0.05)  | .                   |
| Older than 65 years                        | .                   | 0.51***<br>(0.18)  | .                   | .                    | 0.38***<br>(0.12)   | .                   |
| Yearly Donation Rate $\times$ Return to WB | .                   | .                  | 0.34***<br>(0.08)   | .                    | .                   | 0.42***<br>(0.06)   |
| Yearly Donation Rate $\times$ Return to P  | .                   | .                  | 0.31***<br>(0.12)   | .                    | .                   | 0.38***<br>(0.04)   |
| Female $\times$ Return to WB               | .                   | .                  | -0.12<br>(0.09)     | .                    | .                   | -0.19***<br>(0.06)  |
| Female $\times$ Return to P                | .                   | .                  | -0.24<br>(0.26)     | .                    | .                   | -0.38**<br>(0.16)   |
| Older than 65 years $\times$ Return to WB  | .                   | .                  | 0.62***<br>(0.19)   | .                    | .                   | 0.45***<br>(0.13)   |
| Older than 65 years $\times$ Return to P   | .                   | .                  | -1.85*<br>(1.01)    | .                    | .                   | -2.53**<br>(1.01)   |
| AB Positive $\times$ Return to WB          | .                   | .                  | -0.07<br>(0.25)     | .                    | .                   | -0.07<br>(0.16)     |
| AB Positive $\times$ Return to P           | .                   | .                  | 0.77**<br>(0.39)    | .                    | .                   | 0.67**<br>(0.3)     |
| O Negative $\times$ Return to WB           | .                   | .                  | 0.21<br>(0.15)      | .                    | .                   | 0.24***<br>(0.09)   |
| O Negative $\times$ Return to P            | .                   | .                  | -0.64<br>(0.6)      | .                    | .                   | -0.24<br>(0.3)      |
| Constant                                   | -4.20***<br>(0.07)  | -4.86***<br>(0.28) | -4.85***<br>(0.3)   | -4.32***<br>(0.04)   | -4.71***<br>(0.15)  | -4.79***<br>(0.16)  |
| Observations                               | 1649                | 1649               | 1649                | 4653                 | 4653                | 4653                |
| Log Likelihood                             | -2141.68            | -2058.27           | -2037.46            | -6123.09             | -5839.65            | -5805.94            |
| Ancillary Parameter ( $\hat{p}$ )          | .                   | .                  | .                   | .                    | .                   | .                   |
| Center Fixed Effects                       | N                   | Y                  | Y                   | N                    | Y                   | Y                   |
| Day of Week Fixed Effects                  | N                   | Y                  | Y                   | N                    | Y                   | Y                   |
| Time of Day Fixed Effects                  | N                   | Y                  | Y                   | N                    | Y                   | Y                   |
| AB Pos & O Neg                             | N                   | Y                  | Y                   | N                    | Y                   | Y                   |
| $\hat{p}$ Return to Plasma                 | -.006***            | -.005***           | -.006***            | -.003**              | -.003**             | -.003**             |
| Constant                                   |                     | -.007***           | -.007***            | -.007***             | -.007***            | -.007***            |

Coefficients of Survival model with Gompertz parametrization. Robust Standard Errors clustered at the donor-level in parentheses and \*, \*\* and \*\*\* indicate statistical significance at the 10%, 5% and 1% levels, respectively. Given that we have a directional hypothesis for the effect of wait time, the estimates on  $\widetilde{Wait}$  are one-tailed; all other coefficient tests are two-tailed. Donors who returned to give plasma before they were eligible to return to give whole blood are never “at risk” of returning to whole blood.

SUPPLEMENTAL TABLE S15: PROPORTIONAL HAZARDS COEFFICIENT, GENDER EFFECTS

|                                                                    | Survey Donors        |                     | Survey Donors, WB only |                   | Survey Donors        |                      |                      |                     | All Donors           |
|--------------------------------------------------------------------|----------------------|---------------------|------------------------|-------------------|----------------------|----------------------|----------------------|---------------------|----------------------|
|                                                                    | Satisfaction         | Intention           | Return                 | Return            | Return               | Return               | Return               | Return              | Return               |
| $\widetilde{Wait}$                                                 | .                    | .                   | -0.01***<br>(0.003)    | 0.001<br>(0.003)  | .                    | .                    | .                    | .                   | .                    |
| $\widetilde{Wait} \times \text{Male}$                              | -0.003***<br>(0.001) | -0.002**<br>(0.001) | .                      | .                 | -0.009***<br>(0.003) | -0.008***<br>(0.003) | .                    | .                   | .                    |
| $\widetilde{Wait} \times \text{Fem}$                               | -0.006***<br>(0.001) | -0.002**<br>(0.001) | .                      | .                 | -0.0096<br>(0.003)   | 0.0003<br>(0.003)    | .                    | .                   | .                    |
| $\widetilde{Wait} \times \text{Male} \times \text{Return to WB}$   | .                    | .                   | .                      | .                 | .                    | .                    | -0.009***<br>(0.003) | -0.01***<br>(0.004) | -0.009***<br>(0.002) |
| $\widetilde{Wait} \times \text{Male} \times \text{Return to P}$    | .                    | .                   | .                      | .                 | .                    | .                    | 0.009<br>(0.01)      | 0.005<br>(0.009)    | 0.003<br>(0.003)     |
| $\widetilde{Wait} \times \text{Female} \times \text{Return to WB}$ | .                    | .                   | .                      | .                 | .                    | .                    | 0.001<br>(0.003)     | 0.002<br>(0.004)    | 0.0009<br>(0.002)    |
| $\widetilde{Wait} \times \text{Female} \times \text{Return to P}$  | .                    | .                   | .                      | .                 | .                    | .                    | 0.02**<br>(0.008)    | 0.02**<br>(0.01)    | 0.003<br>(0.004)     |
| Yearly Donation Rate                                               | 0.02<br>(0.01)       | 0.13***<br>(0.01)   | .                      | .                 | .                    | 0.24***<br>(0.04)    | .                    | .                   | .                    |
| Female                                                             | 0.06*<br>(0.03)      | 0.07***<br>(0.03)   | .                      | .                 | .                    | 0.08<br>(0.07)       | .                    | .                   | .                    |
| Older than 65 years                                                | 0.1*<br>(0.06)       | 0.04<br>(0.06)      | .                      | .                 | .                    | 0.27***<br>(0.1)     | .                    | .                   | .                    |
| AB Positive                                                        | 0.03<br>(0.08)       | 0.06<br>(0.07)      | .                      | .                 | .                    | 0.18<br>(0.18)       | .                    | .                   | .                    |
| O Negative                                                         | 0.03<br>(0.05)       | 0.02<br>(0.05)      | .                      | .                 | .                    | 0.09<br>(0.1)        | .                    | .                   | .                    |
| Yearly Donation Rate $\times$ Return to WB                         | .                    | .                   | .                      | .                 | .                    | .                    | .                    | 0.35***<br>(0.07)   | 0.09**<br>(0.03)     |
| Yearly Donation Rate $\times$ Return to P                          | .                    | .                   | .                      | .                 | .                    | .                    | .                    | 0.29**<br>(0.11)    | 0.28***<br>(0.01)    |
| Female $\times$ Return to WB                                       | .                    | .                   | .                      | .                 | .                    | .                    | .                    | 0.11<br>(0.09)      | -0.24***<br>(0.05)   |
| Female $\times$ Return to P                                        | .                    | .                   | .                      | .                 | .                    | .                    | .                    | 0.34<br>(0.27)      | 0.2**<br>(0.09)      |
| Older than 65 years $\times$ Return to WB                          | .                    | .                   | .                      | .                 | .                    | .                    | .                    | 0.62***<br>(0.19)   | 0.64***<br>(0.12)    |
| Older than 65 years $\times$ Return to P                           | .                    | .                   | .                      | .                 | .                    | .                    | .                    | 1.85*<br>(1.01)     | 0.26<br>(0.22)       |
| AB Positive $\times$ Return to WB                                  | .                    | .                   | .                      | .                 | .                    | .                    | .                    | 0.001<br>(0.26)     | 0.22<br>(0.15)       |
| AB Positive $\times$ Return to P                                   | .                    | .                   | .                      | .                 | .                    | .                    | .                    | 0.71*<br>(0.4)      | 0.5***<br>(0.16)     |
| O Negative $\times$ Return to WB                                   | .                    | .                   | .                      | .                 | .                    | .                    | .                    | 0.23<br>(0.13)      | 0.35**<br>(0.1)      |
| O Negative $\times$ Return to P                                    | .                    | .                   | .                      | .                 | .                    | .                    | .                    | 0.65<br>(0.61)      | -0.54**<br>(0.27)    |
| Constant                                                           | .                    | .                   | -4.08***<br>(0.09)     | -4.29***<br>(0.1) | -4.93***<br>(0.04)   | -5.46***<br>(0.21)   | -4.21***<br>(0.07)   | -4.92***<br>(0.29)  | -4.24***<br>(0.15)   |
| Observations                                                       | 848                  | 848                 | 416                    | 360               | 848                  | 848                  | 1649                 | 1649                | 5584                 |
| Log Likelihood                                                     | .                    | .                   | -934.66                | -786.09           | -1333.37             | -1293.82             | -2138                | -2032.88            | -8473.9              |
| Ancillary Parameter ( $\hat{p}$ )                                  | .                    | .                   | -0.008                 | -0.008            | -0.004               | -0.004               | .                    | .                   | .                    |
| $\chi^2$ test: Wait $\times$ Male = Wait $\times$ Fem              | 2.36                 | .00                 | .                      | .                 | 5.16**               | 4.49**               | .                    | .                   | .                    |
| $\chi^2$ test: Wait $\times$ Male WB = Wait $\times$ Male P        |                      |                     |                        |                   |                      |                      | .00                  | .25                 | 2.96*                |
| $\chi^2$ test: Wait $\times$ Fem WB = Wait $\times$ Fem P          |                      |                     |                        |                   |                      |                      | 6.02**               | 4.92**              | .23                  |

Col (1) & (2) present marginal coefficients from an ordered probit regressions. Cols (3)-(6) present coefficients of Survival model with Gompertz parametrization. Columns (7)-(9) present coefficients from a competing risks hazard model with Gompertz parametrization. Center fixed effects, time of day, day of week, and dummies for AB Positive and O Negative blood types included. Robust Standard Errors in parentheses and \*, \*\* and \*\*\* indicate statistical significance at the 10%, 5% and 1% levels, respectively. Given that we have a directional hypothesis for the effect of wait time, the estimates on  $\widetilde{Wait}$  are one-tailed; all other coefficient tests are two-tailed.

SUPPLEMENTAL TABLE S16: EFFECT OF WAIT TIMES ON PLASMA CONVERSION BY GENDER

|                                       | $Pr[Plasma = 1]$     |                     |
|---------------------------------------|----------------------|---------------------|
|                                       | Survey donors        | All donors          |
| $\widetilde{Wait} \times \text{Male}$ | -0.0003<br>(0.0006)  | -0.0002<br>(0.0004) |
| $\widetilde{Wait} \times \text{Fem}$  | -0.002**<br>(0.0007) | -0.0005<br>(0.0004) |
| Female                                | 0.04<br>(0.04)       | -0.0007<br>(0.02)   |
| Older than 65 years                   | -0.07***<br>(0.01)   | -0.08***<br>(0.006) |
| AB Positive                           | 0.11<br>(0.07)       | 0.07*<br>(0.04)     |
| O Negative                            | -0.04*<br>(0.02)     | -0.007<br>(0.02)    |
| Constant                              | .                    | .                   |
| Observations                          | 843                  | 2388                |
| Pseudo $R^2$                          | 0.09                 | 0.08                |
| Center Fixed Effects                  | Y                    | Y                   |
| Day of Week Fixed Effects             | Y                    | Y                   |
| Time of Day Fixed Effects             | Y                    | Y                   |
| AB Pos & O Neg                        | Y                    | Y                   |

Marginal Coefficients from Probit Regressions. Outcome variable takes a value of 1 if the donor converted to plasma on the subsequent donation and 0 otherwise. Robust Standard Errors in parentheses and \*, \*\* and \*\*\* indicate statistical significance at the 10%, 5% and 1% levels, respectively.

SUPPLEMENTAL TABLE S17: DONATION FREQUENCY AND WAIT TIME EFFECTS

|                                                                              | Survey donors       |                      |                    |                     | All donors           |                      |                     |                      |
|------------------------------------------------------------------------------|---------------------|----------------------|--------------------|---------------------|----------------------|----------------------|---------------------|----------------------|
| $\widetilde{Wait}$                                                           | -0.004**<br>(0.002) | -0.006***<br>(0.002) | -0.003*<br>(0.002) | -0.004**<br>(0.002) | -0.004***<br>(0.001) | -0.006***<br>(0.001) | -0.003**<br>(0.001) | -0.004***<br>(0.001) |
| Frequent Lifetime Donor (75th pct, donations)                                | 0.49***<br>(0.18)   | 0.39**<br>(0.19)     | .                  | .                   | 0.54***<br>(0.11)    | 0.45***<br>(0.11)    | .                   | .                    |
| $\widetilde{Wait} \times$ Frequent Lifetime Donor                            | 0.002<br>(0.004)    | 0.002<br>(0.004)     | .                  | .                   | 0.004*<br>(0.002)    | 0.004*<br>(0.002)    | .                   | .                    |
| $\widetilde{Wait} \times$ New Donor                                          | .                   | .                    | -0.005<br>(0.006)  | -0.005<br>(0.006)   | .                    | .                    | 0.001<br>(0.004)    | 0.0002<br>(0.004)    |
| New Donor                                                                    | .                   | .                    | -0.41***<br>(0.14) | -0.36**<br>(0.14)   | .                    | .                    | -0.63***<br>(0.08)  | -0.59***<br>(0.08)   |
| Female                                                                       | .                   | -0.12*<br>(0.07)     | .                  | -0.17**<br>(0.07)   | .                    | -0.19***<br>(0.04)   | .                   | -0.27***<br>(0.04)   |
| Older than 65 years                                                          | .                   | 0.26***<br>(0.09)    | .                  | 0.47***<br>(0.09)   | .                    | 0.15**<br>(0.07)     | .                   | 0.36***<br>(0.06)    |
| AB Positive                                                                  | .                   | 0.07<br>(0.19)       | .                  | 0.16<br>(0.19)      | .                    | -0.02<br>(0.13)      | .                   | 0.09<br>(0.13)       |
| O Negative                                                                   | .                   | 0.11<br>(0.1)        | .                  | 0.13<br>(0.1)       | .                    | 0.2***<br>(0.06)     | .                   | 0.21***<br>(0.06)    |
| Constant                                                                     | -5.12***<br>(0.05)  | -5.12***<br>(0.19)   | -4.88***<br>(0.04) | -4.91***<br>(0.2)   | -5.19***<br>(0.03)   | -5.04***<br>(0.1)    | -4.93***<br>(0.02)  | -4.75***<br>(0.1)    |
| Observations                                                                 | 848                 | 848                  | 848                | 848                 | 2388                 | 2388                 | 2388                | 2388                 |
| Log Likelihood                                                               | -1310.47            | -1302.36             | -1329.37           | -1311.43            | -3732.79             | -3710.45             | -3779.21            | -3731.38             |
| Ancillary Parameter ( $\hat{p}$ )                                            | -0.004              | -0.004               | -0.004             | -0.004              | -0.003               | -0.003               | -0.004              | -0.003               |
| $\chi^2$ test: $\widetilde{Wait} + \widetilde{Wait} \times$ Frequent Donor=0 | .30                 | .80                  | .                  | .                   | .11                  | .81                  | .                   | .                    |
| $\chi^2$ test: $\widetilde{Wait} + \widetilde{Wait} \times$ New Donor=0      |                     |                      |                    | 1.96                | 3.43                 |                      | .32                 | 1.35                 |

Hazard model with Gompertz parametrization. Robust Standard Errors in parentheses and \*, \*\* and \*\*\* indicate statistical significance at the 10%, 5% and 1% levels, respectively. Given that we have a directional hypothesis for the effect of wait time, the estimates on  $\widetilde{Wait}$  are one-tailed; all other coefficient tests are two-tailed.

SUPPLEMENTAL FIGURE S1: DURATION BY WAIT TIME, WHOLE BLOOD ONLY

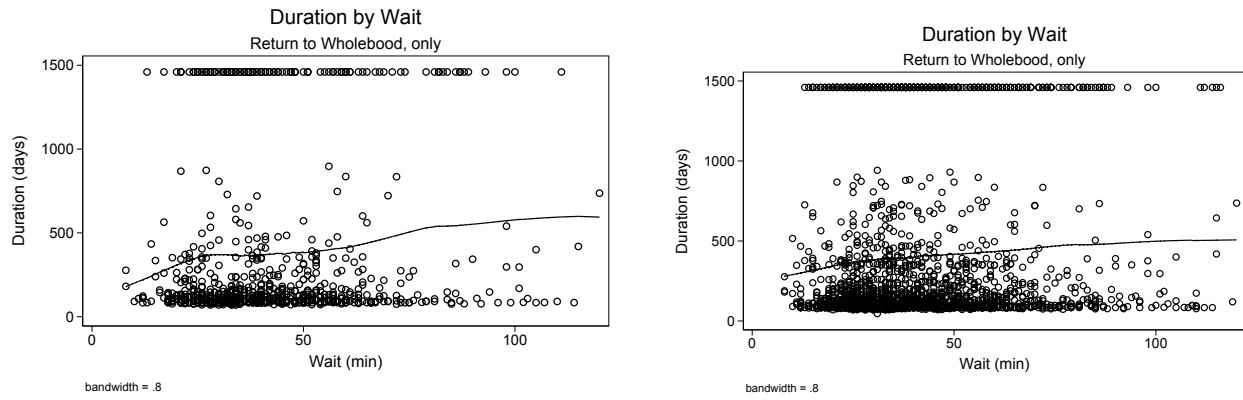

(A) SURVEY DONORS

(B) ALL DONORS

Non-parametric regression of Duration until next donation by wait time.

SUPPLEMENTAL FIGURE S2: DISTRIBUTION OF WAIT TIME BY APPOINTMENT STATUS

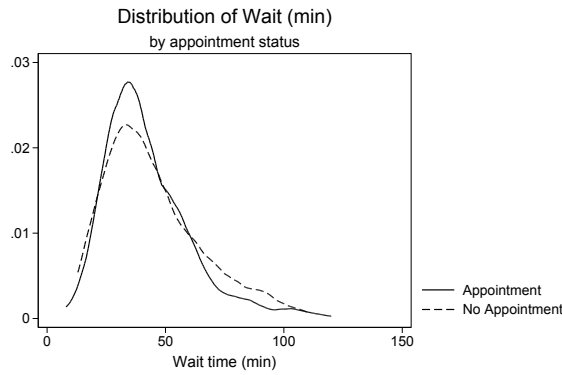

The Kolmogorov-Smirnov equality-of-distributions test cannot reject the null that the distributions are the same (p-value=.38); The Kruskal-Wallis equality-of-populations rank test cannot reject the null that the distribution are drawn from the same population (p-value=.27).

SUPPLEMENTAL FIGURE S3: ARRIVALS, POOLED ACROSS CENTERS

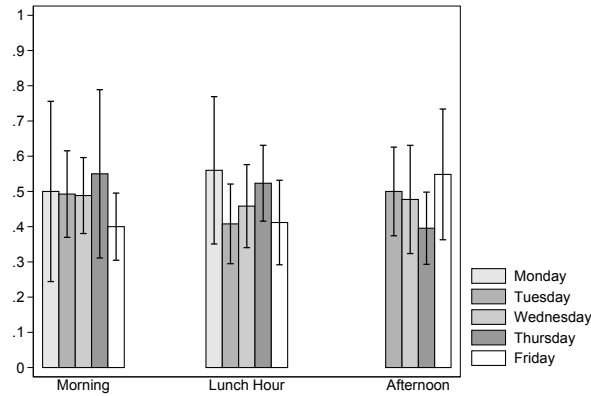

(A) PERCENT OF FEMALE DONORS

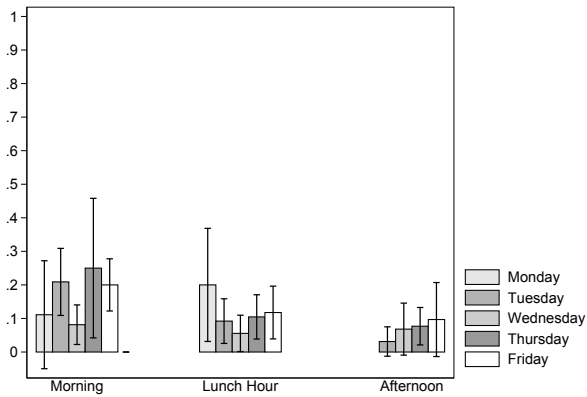

(B) PERCENT OF DONORS OVER 65 YEARS

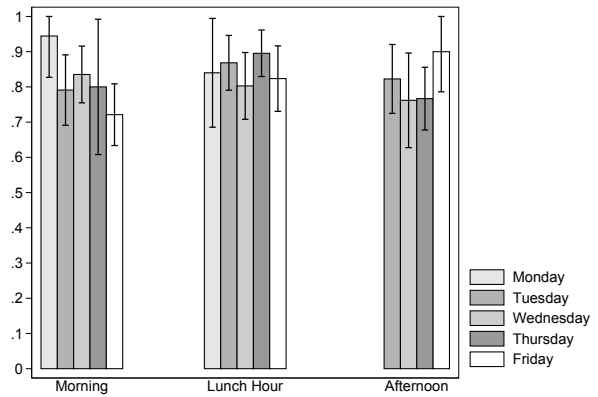

(C) PERCENT WITH APPOINTMENTS

SUPPLEMENTAL FIGURE S4: ARRIVALS BY GENDER

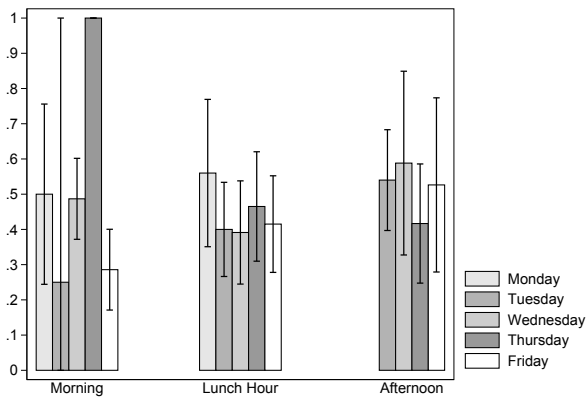

(A) CENTER A

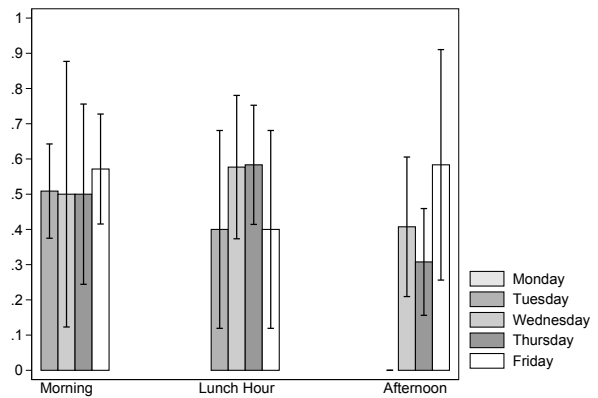

(B) CENTER D

SUPPLEMENTAL FIGURE S5: ARRIVALS BY AGE

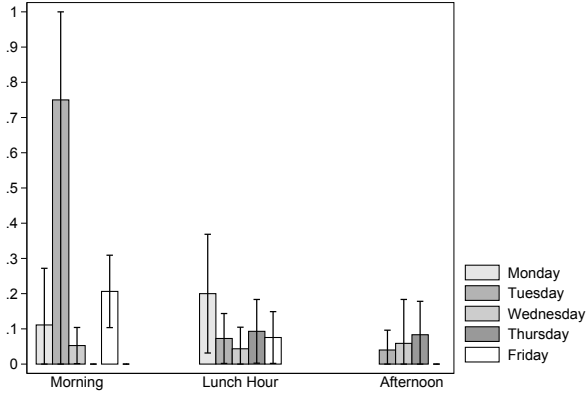

(A) CENTER A

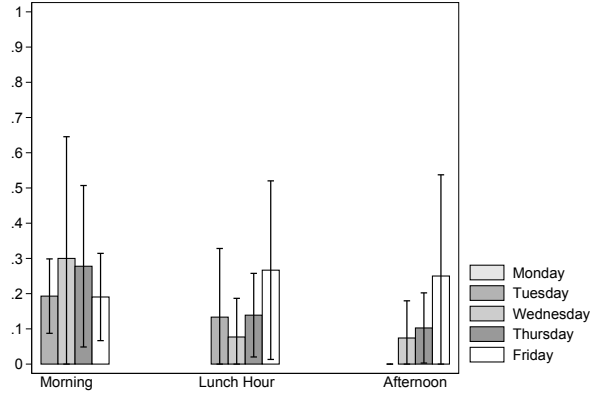

(B) CENTER D

SUPPLEMENTAL FIGURE S6: ARRIVALS BY APPOINTMENTS

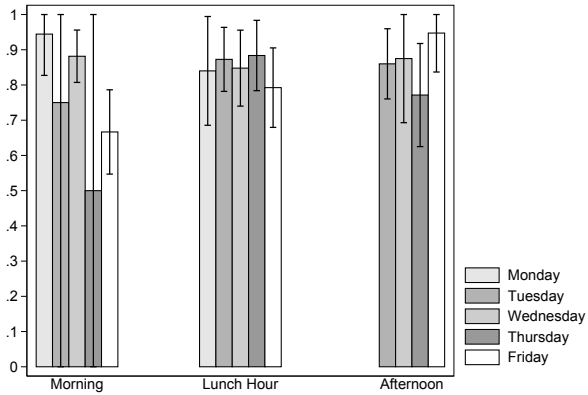

(A) CENTER A

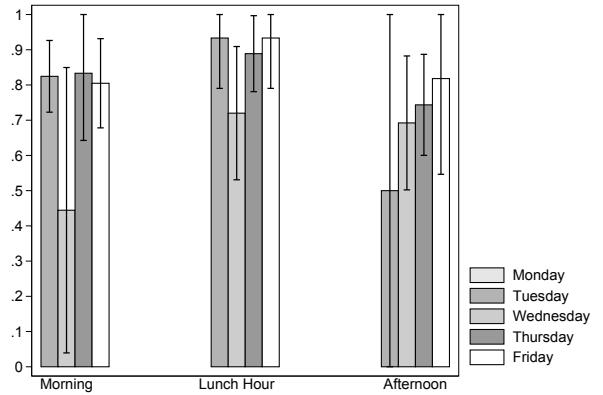

(B) CENTER D

SUPPLEMENTAL FIGURE S7: DONATION FREQUENCY AND STRATEGIC ARRIVALS

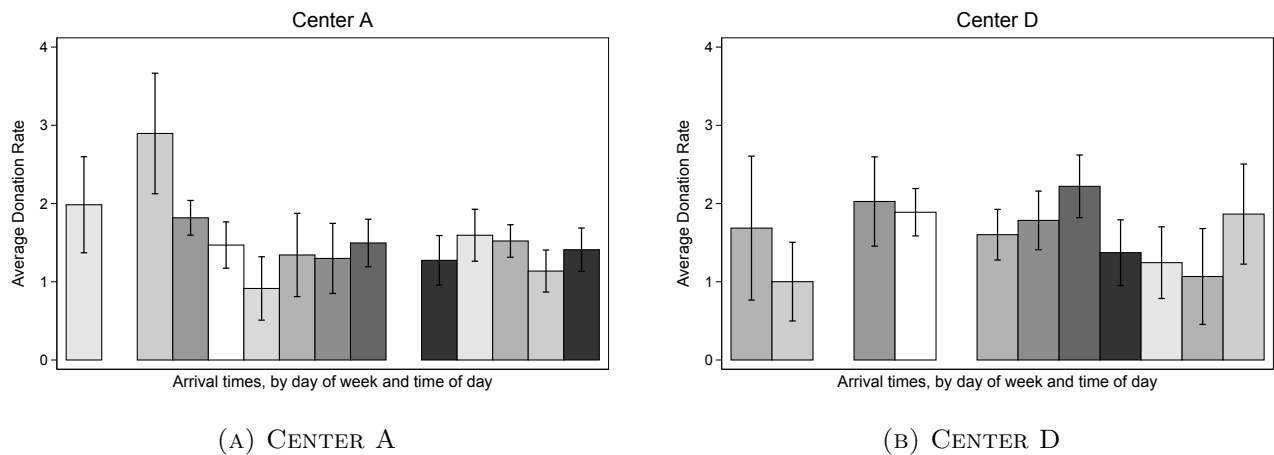

Each bar represents a day of week-time of day combination, listed in order from the shortest historical wait times to the longest historical wait times. At center A, the list of the 15 time blocks from shortest to longest historical wait times is as follows: Monday PM, Monday AM, Wednesday AM, Friday PM, Tuesday PM, Thursday AM, Friday AM, Monday Lunch, Thursday Lunch, Tuesday AM, Wednesday PM, Wednesday Lunch, Tuesday Lunch, Friday Lunch. At center D, the equivalent list is: Monday AM, Monday PM, Tuesday AM, Wednesday AM, Friday AM, Friday PM, Wednesday PM, Monday Lunch, Tuesday Lunch, Thursday AM, Thursday PM, Thursday Lunch, Wednesday Lunch, Tuesday PM, Friday Lunch. The y-axis is the average yearly donation rate of donors in our sample who arrived to donate at each day-time combination.

# Supplementary Material B

## Conceptual Model

Equation 1 is the first order condition resulting from the maximization of Equation 3 in the main text.

$$\ln(\beta) [1 - (\beta\delta)^{t^*}] - \delta^{t^*} \ln(\beta\delta) [1 - \beta^{t^*}] = \frac{f(c_0^i)(1 - \beta\delta)\ln(\beta)}{u(b^i)} \quad (1)$$

Implicitly differentiating 1, it is straightforward to show that  $t^*$  increases as the cost of the last donation  $c_0^i$  increases and the benefits of donating decrease:

$$\frac{\partial t^*}{\partial c_0^i} = -\frac{f'(c_0^i)(1 - \beta\delta)\ln(\beta)}{u(b^i)\delta^{t^*}\ln(\beta\delta)\ln(\delta)(1 - \beta^{t^*})} > 0 \quad (2)$$

$$\frac{\partial t^*}{\partial b^i} = \frac{f(c_0^i)u'(b^i)(1 - \beta\delta)\ln(\beta)}{u(b^i)^2\delta^{t^*}\ln(\beta\delta)\ln(\delta)(1 - \beta^{t^*})} < 0 \quad (3)$$

## Comparative Statics

Recall,  $f'(c_0) > 0$ ,  $0 < \delta, \beta < 1$ ,  $b > 0$ ,  $t \geq 1$ .

In this section, we drop the  $*$  superscript on  $t$ , as well as the  $i$  superscripts on  $b$  and  $c$ . In order to obtain comparative statics for the parameters of the model we use implicit differentiation. First, we are interested in the effect of an increase in costs on  $t^*$ . This comparative static is obtained through implicit differentiation of equation 1. To simplify notation, I will drop the superscript on  $t$ . Thus, I'm interested in  $\frac{\partial t}{\partial c_0}$ .

$$\begin{aligned} D \left[ \ln(\beta) [1 - (\beta\delta)^t] - \delta^t \ln(\beta\delta) [1 - \beta^t] - \frac{f(c_0)(1 - \beta\delta)\ln(\beta)}{u(b)} \right] &= D[0] \\ D [-\ln\beta(\beta\delta)^t] - D [\delta^t \ln(\beta\delta)] + D [(\beta\delta)^t \ln(\beta\delta)] - D \left[ \frac{f(c_0)(1 - \beta\delta)\ln(\beta)}{b} \right] &= 0 \\ \partial t \delta^t \ln(\beta\delta) [-\beta^t \ln(\beta) - \ln(\delta) + \beta^t \ln(\beta\delta)] &= \frac{f'(c_0)(1 - \beta\delta)\ln(\beta)}{u(b)} \partial c_0 \\ \frac{\partial t}{\partial c_0} &= -\frac{f'(c_0)(1 - \beta\delta)\ln(\beta)}{u(b)\delta^t \ln(\beta\delta)\ln(\delta)(1 - \beta^t)} > 0 \end{aligned} \quad (4)$$

It is then straightforward to find an expression for  $\frac{\partial t}{\partial b}$

$$\frac{\partial t}{\partial b} = \frac{f(c_0)u'(b)(1 - \beta\delta)\ln(\beta)}{(u(b))^2 \delta^t \ln(\beta\delta)\ln(\delta)(1 - \beta^t)} < 0 \quad (5)$$

Expressions for  $\frac{\partial t}{\partial \beta}$  and  $\frac{\partial t}{\partial \delta}$  can also be obtained via implicit differentiation.  $\frac{\partial t}{\partial \delta}$  can be obtained as follows from equation 1:

$$\begin{aligned} & t' [ -(\beta\delta)^t \delta \ln(\beta\delta) - \delta \delta^t \ln(\beta\delta) \ln(\delta) + \delta (\beta\delta)^t \ln(\beta\delta) \ln(\beta\delta) ] \\ &= -\frac{f(c_0)\beta\delta \ln(\beta)}{u(b)} + t [ (\beta\delta)^t + \delta^t \ln(\beta\delta) - (\beta\delta)^t \ln(\beta\delta) ] + \delta^t (1 - \beta^t) \end{aligned}$$

Rearranging and simplifying the righthand side of the equation yields:

$$\begin{aligned} & t' \delta \delta^t \ln(\beta\delta) [ \beta^t (\ln(\beta) - 1) - \ln(\delta)(1 - \beta^t) ] \\ &= -\frac{f(c_0)\beta\delta \ln(\beta)}{u(b)} + t [ (\beta\delta)^t + \delta^t \ln(\beta\delta) - (\beta\delta)^t \ln(\beta\delta) ] + \delta^t (1 - \beta^t) \end{aligned}$$

Finally, solving for  $t' = \frac{\partial t}{\partial \delta}$

$$\frac{\partial t}{\partial \delta} = \frac{1}{\delta \delta^t \ln(\beta\delta) [ \beta^t (\ln(\beta) - 1) - \ln(\delta)(1 - \beta^t) ]} \left[ -\frac{f(c_0)\beta\delta \ln(\beta)}{u(b)} + t [ (\beta\delta)^t + \delta^t \ln(\beta\delta) - (\beta\delta)^t \ln(\beta\delta) ] + \delta^t (1 - \beta^t) \right] \quad (6)$$

$\frac{\partial t}{\partial \delta} > 0$  when two conditions are met:

1.  $\beta^t (\ln(\beta) - 1) - \ln(\delta)(1 - \beta^t) > 0 \rightarrow \frac{\beta^t}{1 - \beta^t} < \frac{-\ln(\delta)}{1 - \ln(\beta)}$
2.  $t [ (\beta\delta)^t + \delta^t \ln(\beta\delta) - (\beta\delta)^t \ln(\beta\delta) ] > 0 \rightarrow \frac{\beta^t}{1 - \beta^t} < -\ln(\beta\delta)$

When these two conditions hold,  $\frac{\partial t}{\partial \delta} > 0$ . This relationship between  $t^*$  and  $\delta$  is intuitive: the more quickly the benefits (e.g., the warm glow) from donating wear off, then the more quickly a donor will return to donate in order to reset his benefits.

Again, use implicit differentiation to obtain  $\frac{\partial t}{\partial \beta}$  from equation 1

$$\begin{aligned} & t' [ -\beta (\beta\delta)^t \ln(\beta\delta) \ln \beta - \beta \delta^t \ln \delta \ln(\beta\delta) + \beta (\beta\delta)^t \ln(\beta\delta) \ln(\beta\delta) ] \\ &= \frac{f(c_0^i) [ 1 - \beta\delta - \beta\delta \ln \beta ]}{u(b)} - (1 - \delta^t) - t (\beta\delta)^t \ln \delta \end{aligned}$$

Simplifying the left-hand side of the equation yields:

$$t' \beta \delta^t \ln(\beta\delta) [ (\beta^t - 1) \ln \delta ] = \frac{f(c_0^i) [ 1 - \beta\delta - \beta\delta \ln \beta ]}{u(b)} - (1 - \delta^t) - t (\beta\delta)^t \ln \delta$$

Solving for  $t' = \frac{\partial t}{\partial \beta}$  yields:

$$\frac{\partial t}{\partial \beta} = \frac{-1}{\beta \delta^t \ln(\beta \delta) [(1 - \beta^t) \ln \delta]} \left[ \frac{f(c_0^i) [1 - \beta \delta - \beta \delta \ln \beta]}{u(b)} - (1 - \delta^t) - t(\beta \delta)^t \ln \delta \right] \quad (7)$$

$\frac{\partial t}{\partial \beta} > 0$  when  $\frac{f(c_0^i) [1 - \beta \delta - \beta \delta \ln \beta]}{u(b)} - (1 - \delta^t) - t(\beta \delta)^t \ln \delta < 0$  and  $\frac{\partial t}{\partial \beta} < 0$  if  $\frac{f(c_0^i) [1 - \beta \delta - \beta \delta \ln \beta]}{u(b)} - (1 - \delta^t) - t(\beta \delta)^t \ln \delta > 0$ .

The benefits of donating are discounted by beta in every period, whereas the costs are discounted only once every  $t^*$  periods. An increasing relationship between  $t^*$  and  $\beta$  occurs when, as  $\beta$  increases, the increase in the present value of a donor's stream of benefits increases more than the discounted present value of future costs.

# Supplementary Material C

## Survey

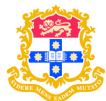

**The University of Sydney**

**Professor Robert Slonim**  
*Professor in Economics*

**Discipline of Economics**  
**Faculty of Economics and Business**

Merewether Building H04  
NSW 2006 Australia  
Telephone: +61 2 9036 9187  
[r.slonim@econ.usyd.edu.au](mailto:r.slonim@econ.usyd.edu.au)

### Survey of Donation Wait Time Experiences

Please answer all questions truthfully. There are no right or wrong answers. We want to learn your thoughts about your donation experience today.

**1. The first set of questions refers to your overall experience today from the time you arrived until now:**

|                                                                                                                               | Not at All Satisfied     |                          |                          |                          | Completely Satisfied     |                          |                          |
|-------------------------------------------------------------------------------------------------------------------------------|--------------------------|--------------------------|--------------------------|--------------------------|--------------------------|--------------------------|--------------------------|
|                                                                                                                               | 1                        | 2                        | 3                        | 4                        | 5                        | 6                        | 7                        |
| How satisfied were you with the <u>overall experience</u> today?                                                              | <input type="checkbox"/> |
| How satisfied were you with the <u>quality of the service</u> you received from the Australian Red Cross Blood Service today? | <input type="checkbox"/> |
| How satisfied were you with the <u>total length</u> of time it took to donate today?                                          | <input type="checkbox"/> |

**2. The next two questions refer to your future intentions:**

What is the likelihood that you will donate again in the next 6 months?

| No Chance |   |   |   |   |   |   |   |   |   | Practically Certain |
|-----------|---|---|---|---|---|---|---|---|---|---------------------|
| 0         | 1 | 2 | 3 | 4 | 5 | 6 | 7 | 8 | 9 | 10                  |

How likely would you be to recommend donating to your friends and family?

| Not at All Likely |   |   |   |   |   |   | Very Likely |
|-------------------|---|---|---|---|---|---|-------------|
| 1                 | 2 | 3 | 4 | 5 | 6 | 7 |             |

**3. Approximately, how many times have you donated any blood products (for example, whole blood, plasma, platelets) in the last year?**

\_\_\_\_\_ times

4. Did you have an appointment today? Yes  No

If yes, what time was your appointment? \_\_\_\_\_

And when did you arrive?

Before your appointment time  => If so, about how many minutes before? \_\_\_\_\_

On time

After your appointment time  => If so, about how many minutes after? \_\_\_\_\_

5. The next questions are about your waiting experience:

Before arriving, how long did you expect to wait **before your eligibility interview** (the eligibility interview is when the Donor Services Staff asked you questions to determine if you could donate blood today)? \_\_\_\_\_ minutes

Without looking at the time, how long do you think you actually waited **before your eligibility interview**? \_\_\_\_\_ minutes

Before arriving, how long did you expect to wait **from the end of your eligibility interview** till the **beginning of the blood draw**? \_\_\_\_\_ minutes

Without looking at the time, how long do you think you actually waited **from the end of your eligibility interview** till the **beginning of the blood draw**? \_\_\_\_\_ minutes

Before arriving, how long did you expect the **donation process** to take from arrival at the centre to entering the recovery room? \_\_\_\_\_ minutes

Without looking at the time, how long do you think this **donation process** actually took today? \_\_\_\_\_ minutes

How acceptable was the total wait time you experienced today?

Completely Unacceptable 1  2  3  4  5  6  7  Completely Acceptable

If you have donated in the past, how did your wait time today compare to a typical past visit?

Previously Much Shorter 1  2  3  4  5  6  7  Previously Much Longer

How many other people were waiting to donate while you were waiting to donate today?

None  1  2  3  4  5  6-7  8-10  11-15  16-20  More than 20

How did your wait time today compare to the wait time of the other people in the waiting room?

Waited LESS Than Others 1  2  3  4  5  6  7  Waited MORE Than Others

What did you do while you waited (for example, took a nap, called a friend on my mobile, read a book/magazine/paper, just relaxed, snacked, etc.)?

---



---

Did you come alone or with others?      Alone       with Others

If you came with others, how many and who were they (for example, came with three friends, brought my child, came with partner)?

---

How many of them also donated? (for example, 2 friends did, child too young, partner donated)?

---

How did you feel about waiting experience today?

|                   | Strongly Disagree        |                          |                          |                          |                          |                          | Strongly Agree           |                          |
|-------------------|--------------------------|--------------------------|--------------------------|--------------------------|--------------------------|--------------------------|--------------------------|--------------------------|
|                   | 1                        | 2                        | 3                        | 4                        | 5                        | 6                        | 7                        |                          |
| It was pleasant   | <input type="checkbox"/> |
| It was enjoyable  | <input type="checkbox"/> |
| It was fair       | <input type="checkbox"/> |
| It was reasonable | <input type="checkbox"/> |

How did you feel *while you were waiting today*?

|                   | Strongly Disagree        |                          |                          |                          |                          |                          | Strongly Agree           |                          |
|-------------------|--------------------------|--------------------------|--------------------------|--------------------------|--------------------------|--------------------------|--------------------------|--------------------------|
|                   | 1                        | 2                        | 3                        | 4                        | 5                        | 6                        | 7                        |                          |
| I felt relaxed    | <input type="checkbox"/> |
| I felt calm       | <input type="checkbox"/> |
| I felt annoyed    | <input type="checkbox"/> |
| I felt angry      | <input type="checkbox"/> |
| I felt frustrated | <input type="checkbox"/> |
| I felt upset      | <input type="checkbox"/> |
| I felt tense      | <input type="checkbox"/> |
| I felt content    | <input type="checkbox"/> |
| I felt worried    | <input type="checkbox"/> |

If you had to wait today, why do you think you had to wait?

---

How common do you think this reason is for making people wait to donate?  
 Very Uncommon 1  2  3  4  5  6  7  Very Common

To what degree could the Red Cross Blood Service solve this problem?  
 Not Much They Could Do 1  2  3  4  5  6  7  A Lot They Could Do

Were you offered an explanation for the delay? Yes  No

If yes, how satisfactory was the explanation you were given?  
 Not at All Satisfactory 1  2  3  4  5  6  7  Completely Satisfactory

**6. The next set of questions refers to your attitudes towards donating blood:**

|                                                                  | Strongly Disagree        | 1                        | 2                        | 3                        | 4                        | 5                        | 6                        | 7                        | Strongly Agree           |
|------------------------------------------------------------------|--------------------------|--------------------------|--------------------------|--------------------------|--------------------------|--------------------------|--------------------------|--------------------------|--------------------------|
| Blood donation is something I rarely even think about.           | <input type="checkbox"/> |
| I would feel a loss if I were forced to give up donating blood.  | <input type="checkbox"/> |
| For me, being a blood donor means more than just donating blood. | <input type="checkbox"/> |
| Blood donation is an important part of who I am.                 | <input type="checkbox"/> |
| I feel a moral obligation to give blood.                         | <input type="checkbox"/> |
| I feel a personal responsibility to give blood.                  | <input type="checkbox"/> |
| It is a social obligation to give blood.                         | <input type="checkbox"/> |

**7. These questions refer to your attitude toward the Australian Red Cross Blood Service:**

|                                                          | Strongly Disagree        | 1                        | 2                        | 3                        | 4                        | 5                        | 6                        | 7                        | Strongly Agree           |
|----------------------------------------------------------|--------------------------|--------------------------|--------------------------|--------------------------|--------------------------|--------------------------|--------------------------|--------------------------|--------------------------|
| The Blood Service has high integrity.                    | <input type="checkbox"/> |
| The Blood Service can be counted on to do what is right. | <input type="checkbox"/> |
| The Blood Service is perfectly honest and truthful.      | <input type="checkbox"/> |
| The Blood Service has fast efficient procedures.         | <input type="checkbox"/> |
| The Blood Service is highly competent.                   | <input type="checkbox"/> |
| The Blood Service knows what they are doing.             | <input type="checkbox"/> |

8 *Were you asked to make an appointment for a future donation?* Yes  No

If "No", how likely would you be to make a new donation appointment if asked?

Very Unlikely 1  2  3  4  5  6  7  Very Likely

If "Yes", did you make (or will you be making) an appointment? Yes  No

If you were asked to make an appointment but chose not to, why did you not want to make an appointment for a future donation?

---

9. *And finally a few questions about yourself:*

Are you Male or Female? Male  Female

What year were you born (for example, 1962)? \_\_\_\_\_

|                                                                                                            | Minimal<br>Time Pressure |                          |                          |                          | Intense<br>Time Pressure |                          |                          |
|------------------------------------------------------------------------------------------------------------|--------------------------|--------------------------|--------------------------|--------------------------|--------------------------|--------------------------|--------------------------|
|                                                                                                            | 1                        | 2                        | 3                        | 4                        | 5                        | 6                        | 7                        |
| On a <i>typical day</i> , how <i>time pressured</i> (i.e., over-scheduled, too, busy, rushed) do you feel? | <input type="checkbox"/> |
| <i>Today</i> , before you came to donate, how time pressured did you feel?                                 | <input type="checkbox"/> |
| How time pressured do you feel <i>currently</i> ?                                                          | <input type="checkbox"/> |
